# Supplementary material
Source: PubMed Central journal article supplement (PMC406444)
Supplement: pnas_101_18_6929__2.pdf [file pnas_101_18_6929__2.pdf]

**Table 1. Chemical sequence analysis of attractin family proteins**

| <b>Species/Treatment</b>     | <b>Fragment</b> | <b>Sequence</b>                                               | <b>Procedures</b> |
|------------------------------|-----------------|---------------------------------------------------------------|-------------------|
| <b><i>A. brasiliiana</i></b> |                 |                                                               |                   |
| Red. & Alk.                  | (1-58)          | DQNXDIGNITSQXQMQHQNDDANGXDTIIIEEXKTSMVERXQNQEFESAS            | Edman             |
| Red. & Alk./Glu-C            | (48-58)         | SASGSTTLGPQ                                                   | Edman             |
| Sequence                     | (1-58)          | DQNC DIGNITSQCQMQHQNCD DANGCDTIIIEECKTSMVERCQNQEFESASGSTTLGPQ |                   |
| <b><i>A. fasciata</i></b>    |                 |                                                               |                   |
| Red. & Alk.                  | (1-58)          | DQNXDIGNITSQXEMQHQNDDANGXNTIIIEEXKTSMV                        | Edman             |
| Red. & Alk./CNBr             | (16-58)         | QHQNDDANGXNTIIIEEXKTSMVERXQNQEFE                              | Edman             |
| Red. & Alk./Lys-C            | (35-58)         | TSMVERXQNQEFESASGSTTLGPQ                                      | Edman             |
| Sequence                     | (1-58)          | DQNC DIGNITSQCEMQHQNCD DANGCNTIIIEECKTSMVERCQNQEFESASGSTTLGPQ |                   |
| <b><i>A. vaccaria</i></b>    |                 |                                                               |                   |
| Red. & Alk.                  | (1-56)          | NNKXDIEFATSEXEMRYQDXGEASSXTALIEEXKTSLQEEQNQA                  | Edman             |
| Red. & Alk./Lys-C            | (35-56)         | TSLQEEQNQASSDE----VRPE                                        | Edman             |
| 3'-RACE/cloning              | (36-56)         | SLQEECNQASSDESSTTVRPE                                         | DNA               |
| Sequence                     | (1-56)          | NNKCDIEFATSECEMRYQDCGEASSCTALIEECKTSLQEECNQASSDESSTTVRPE      |                   |
| <b><i>A. depilans</i></b>    |                 |                                                               |                   |
| Red. & Alk.                  | (1-56)          | NNKXDLEFASSEXQMRYQDXGEAS-XTALIEE                              | Edman             |
| Red. & Alk./CNBr             | (16-56)         | RYQDXGEAS-XTALIEEXKTSLQE-XDQAS                                | Edman             |
| Red. & Alk./Lys-C            | (35-56)         | TSLQEEXDQASSES--TTIRPE                                        | Edman             |
| 3'-RACE/cloning              | (36-56)         | EFASSECQMRYQDCGEASNCTALIEECKTSLQEECNQASSESSTTIRPE             | DNA               |
| Sequence                     | (1-56)          | NNKCDLEFASSECQMRYQDCGEASNCTALIEECKTSLQEECDQASSESSTTIRPE       |                   |

Red. & Alk., reduction and alkylation; X, pyridylethyl cysteine; Glu-C, endoproteinase Glu-C; CNBr, cyanogen bromide; Lys-C, endoproteinase Lys-C; Edman, Edman degradation sequencing; 3'-RACE, rapid amplification of cDNA ends; \*, indicates microsequencer malfunction at this residue.
