# Supplementary material
Source: PubMed Central journal article supplement (PMC406444)
Supplement: pnas_101_18_6929__3.pdf [file pnas_101_18_6929__3.pdf]

**Table 2. Subgenera and species examined for *Aplysia* attractin-related proteins**

| <b>Subgenus</b>      | <b>Species</b>                                                                                                                                                                                                                                                                                   |
|----------------------|--------------------------------------------------------------------------------------------------------------------------------------------------------------------------------------------------------------------------------------------------------------------------------------------------|
| <i>Pruvotaplysia</i> | <i>parvula punctata</i>                                                                                                                                                                                                                                                                          |
| <i>Neoaplysia</i>    | <b><i>californica</i></b>                                                                                                                                                                                                                                                                        |
| <i>Varria</i>        | <b><i>brasiliansa fasciata</i></b> <i>cervina cornigera cronullae dactylomela</i><br><i>denisoni extraordinaria gigantean gracilis inca keraudreni kurodai</i><br><i>maculata morio oculifera pulmonica rehderi reticulata robertsi</i><br><i>sagamiana sowerbyi syneyensis willcoxi winneba</i> |
| <i>Aplysia</i>       | <b><i>depilans vaccaria</i></b> <i>cedrosensis dura juliana nigra</i>                                                                                                                                                                                                                            |
| <i>Phycophyla</i>    | <i>euchlora</i>                                                                                                                                                                                                                                                                                  |

Subgenera and species that were examined for attractin-related proteins are indicated in bold. Modified from Kandel (1).

1. Kandel, E. R. (1979) in *Behavioral Biology of Aplysia* (Freeman, San Francisco).
