# Supplementary material
Source: PubMed Central journal article supplement (PMC406444)

Relative Intensity

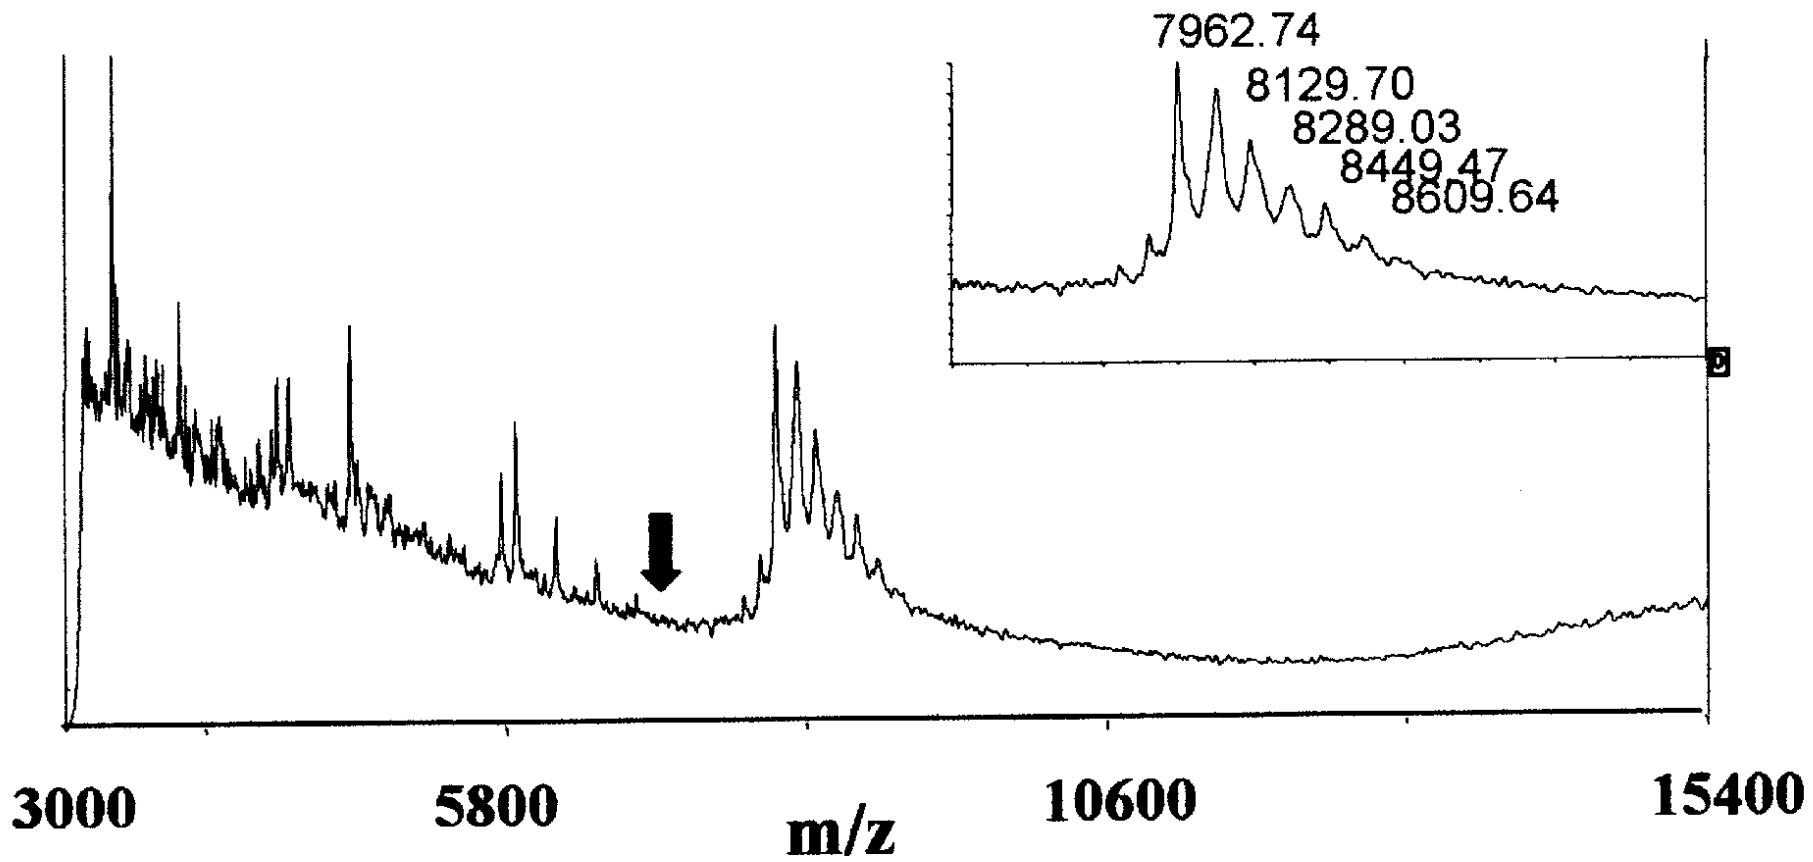

Supplement: pnas_101_18_6929__4.pdf [file pnas_101_18_6929__4.pdf]

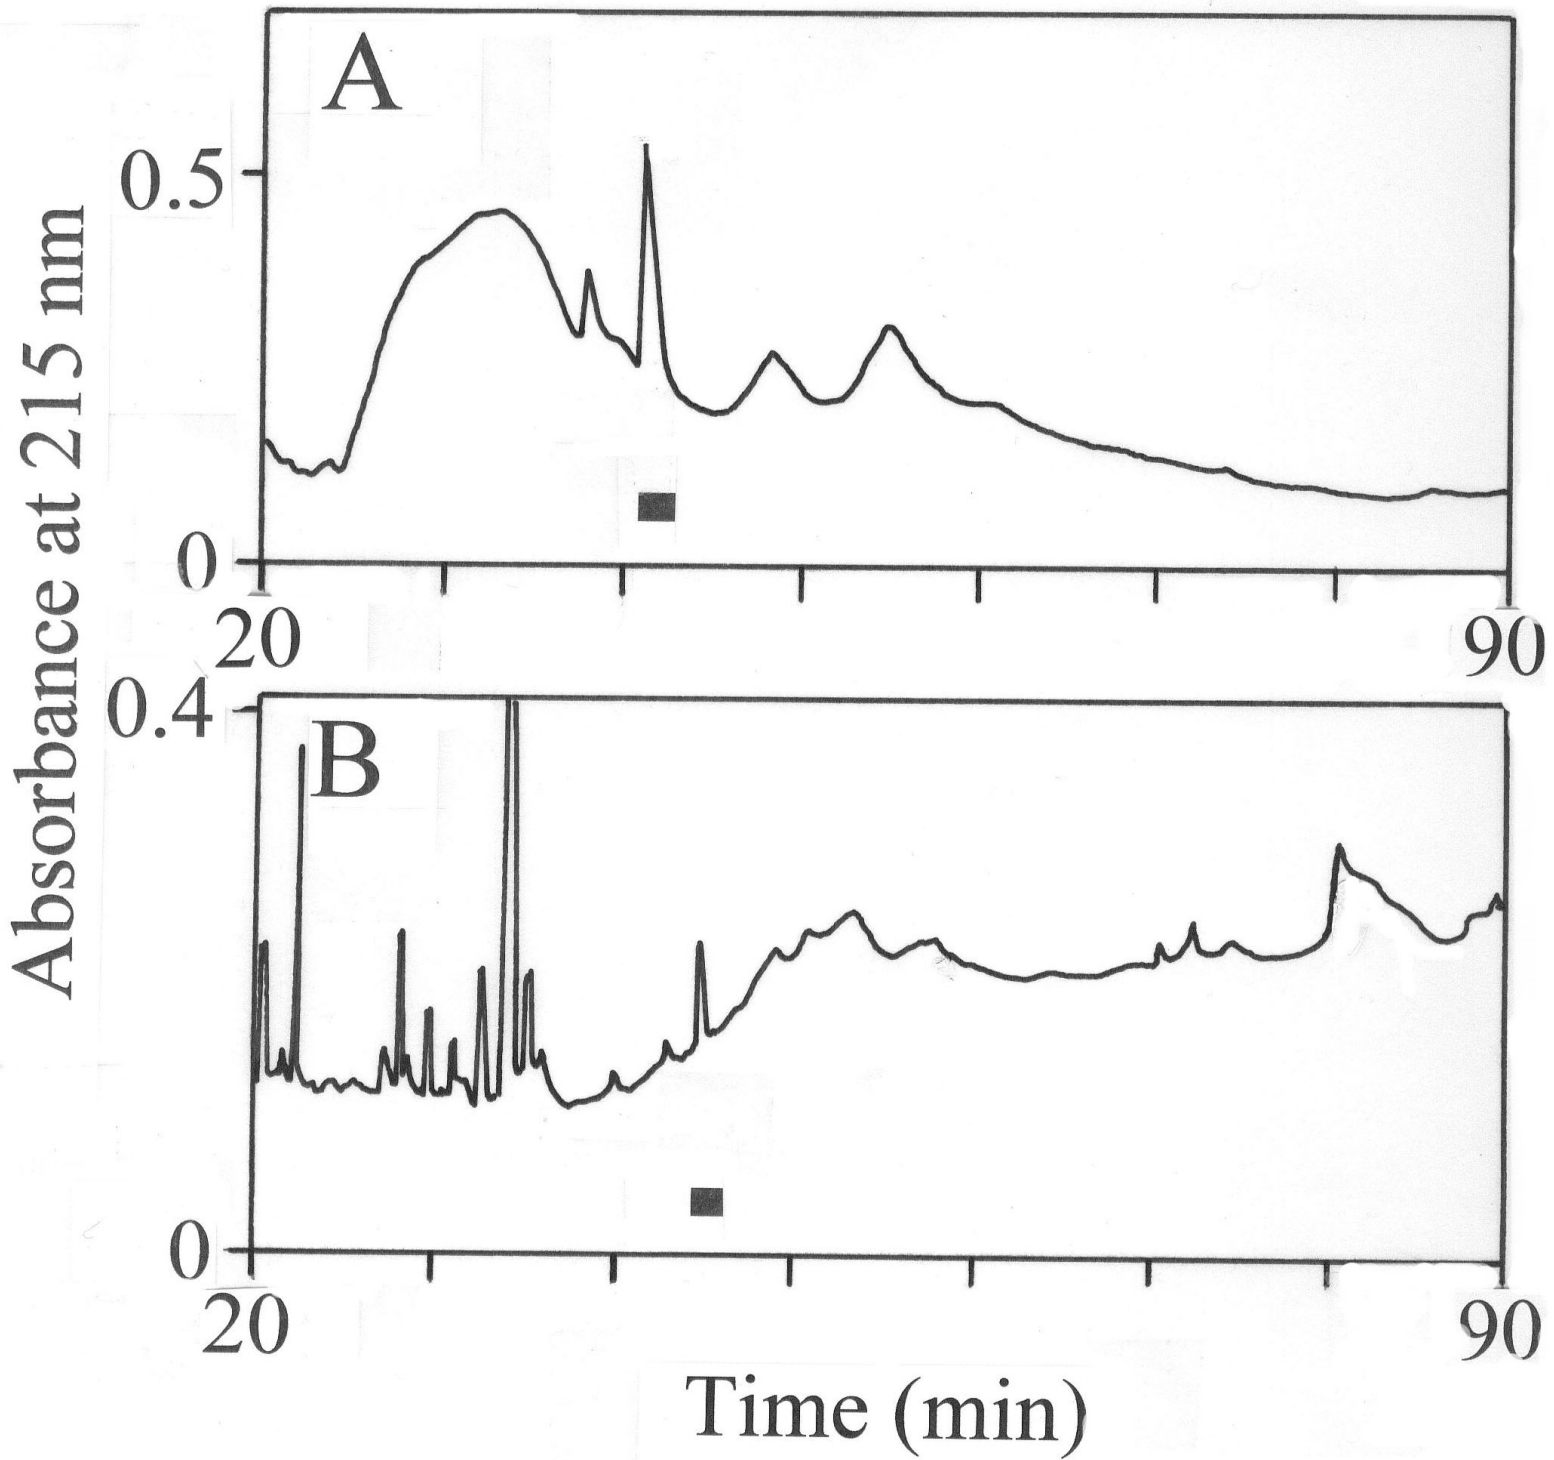

Supplement: pnas_101_18_6929__5.pdf [file pnas_101_18_6929__5.pdf]
